# Supplementary material for: Affinity enhancement of polo-like kinase 1 polo box domain-binding ligands by a bivalent approach using a covalent kinase-binding component
Source: Royal Society of Chemistry journal article supplement (doi:10.1039/d4cb00031e), 2024-01-01
Supplement: d4cb00031e1.pdf [file d4cb00031e1.pdf]

## Electronic Supplementary Information

### **Affinity enhancement of polo-like kinase 1 polo box domain-binding ligands by a bivalent approach using a covalent kinase-binding component**

Kohei Tsuji,<sup>a,b,\*</sup> Hirokazu Tamamura,<sup>b</sup> Terrence R. Burke, Jr.<sup>a,\*</sup>

<sup>a</sup>Chemical Biology Laboratory, Center for Cancer Research, National Cancer Institute, National Institutes of Health, Frederick, MD 21702, USA

<sup>b</sup>Department of Medicinal Chemistry, Institute of Biomaterials and Bioengineering, Tokyo Medical and Dental University, Tokyo 101-0062, Japan

\*Correspondence to K. Tsuji, E-mail: [ktsuji.mr@tmd.ac.jp](mailto:ktsuji.mr@tmd.ac.jp); Fax: +81-3-5280-8039; T. R. Burke, Jr., E-mail: [burkete@mail.nih.gov](mailto:burkete@mail.nih.gov); Fax: 301-846-6033

| <b>Contents</b>                                                                                                                                    | <b>Page</b> |
|----------------------------------------------------------------------------------------------------------------------------------------------------|-------------|
| <b>I. SYNTHETIC PROCEDURES</b>                                                                                                                     |             |
| 1. General procedures                                                                                                                              | S4          |
| 2. General Fmoc-based solid-phase peptide synthesis (Fmoc-SPPS) protocols for the synthesis of bivalent ligands                                    | S4          |
| 3. Synthesis of succinylated Wortmannin                                                                                                            | S6          |
| 4. Synthesis of bivalent ligands <b>7</b> and <b>8</b>                                                                                             | S7          |
| 5. Analytical HPLC data for peptides <b>7</b> and <b>8</b>                                                                                         | S8          |
| <b>II. BIOLOGICAL EVALUATION</b>                                                                                                                   |             |
| 1. Expression and purification of full-length Polo-like kinase 1 (Plk1) for fluorescence polarization (FP) assays and fluorescence recovery assays | S9          |
| 2. FP assays using purified full-length Plk1                                                                                                       | S10         |
| 3. Fluorescence recovery assays using purified full-length Plk1                                                                                    | S10         |
| 4. Cell proliferation assays using HeLa cells                                                                                                      | S11         |
| <b>SCHEMES</b>                                                                                                                                     |             |
| Scheme S1. Synthesis of succinylated Wortmannin                                                                                                    | S6          |
| Scheme S2. Synthesis of bivalent ligands <b>7</b> and <b>8</b>                                                                                     | S7          |
| <b>TABLE</b>                                                                                                                                       |             |
| Table S1. Characterized data of synthesized peptides                                                                                               | S7          |
| <b>FIGURES</b>                                                                                                                                     |             |
| Figure S1. Results from fluorescence recovery assays with pre-treatment of Plk1 with the bivalent ligands <b>3</b> and <b>7</b>                    | S12         |

|                                                                                                                                                                          |     |
|--------------------------------------------------------------------------------------------------------------------------------------------------------------------------|-----|
| Figure S2. Results from cell proliferation assays of bivalent ligands <b>7</b> and <b>8</b> using HeLa cells                                                             | S13 |
| Figure S3. Results from fluorescence polarization (FP) assays of bivalent ligands <b>3</b> , <b>5</b> , <b>7</b> and <b>8</b> in Table 1                                 | S13 |
| Figure S4. Results from fluorescence polarization (FP) assays of bivalent ligands <b>3</b> and <b>7</b> with or without pre-treatment of Plk1 with Wortmannin in Table 2 | S14 |
| Figure S5. Results from fluorescence recovery assays of BI2536 and Wortmannin with different incubation time at r.t. in Table 3                                          | S15 |
| Figure S6. Results from fluorescence recovery assays of BI2536 and Wortmannin with different incubation time at 4 °C in Table 3                                          | S15 |
| <b>REFERENCES</b>                                                                                                                                                        | S16 |

## I. SYNTHETIC PROCEDURES

**1. General procedure.** All experiments involving moisture-sensitive compounds were conducted under anhydrous conditions (positive argon pressure) using standard syringe, cannula, and septa apparatus. Commercial reagents were purchased from Sigma, TCI America, Acros, Alfa Aesar, Chem-Impex, or Novabiochem. All solvents were purchased in anhydrous form (Aldrich) and used without further drying. HPLC-grade hexane, EtOAc, dichloromethane (DCM), and MeOH were used for chromatography. Silica gel column chromatography employed a Teledyne CombiFlash Rf 200 instrument with either EtOAc/hexane or MeOH/DCM gradients. Nuclear Magnetic Resonance (NMR) spectra were recorded using a Varian Inova 400 MHz or 500 MHz spectrometer. Preparative HPLC purification was performed using a Waters 2545 binary pump (0.1% trifluoroacetic acid (TFA) in MeCN/0.1% TFA in H<sub>2</sub>O gradient) with a Phenomenex Gemini-C<sub>18</sub> (5 μm, 250 x 21 mm) preparative column at a flow rate of 10 cm<sup>3</sup> min<sup>-1</sup> with UV detection at 210 nm. Analytical HPLC analyses of purified peptides were performed using an Agilent 1200 series quaternary pump (0.1% TFA in MeCN/0.1% TFA in H<sub>2</sub>O gradient) with a Phenomenex Gemini-C<sub>18</sub> (5 μm, 250 x 4 mm) analytical column, 1 mL/min flow rate with UV detection at 210 nm.

**2. General Fmoc-based solid-phase peptide synthesis (Fmoc-SPPS) protocols for the synthesis of bivalent ligands.** NovaSyn<sup>®</sup> TGR resin (Novabiochem, 0.25 mmol/g) was pre-swollen in *N*-methylpyrrolidone (NMP) for 20 min with shaking. The following loading procedure was used where applicable. 9-Fluorenylmethyloxycarbonyl (Fmoc)-protected amino acids (2.0 – 4.0 equivalents based on resin loading) were dissolved in NMP and pre-activated by the addition of 1-[bis(dimethylamino)methylene]-1*H*-1,2,3-triazolo[4,5-*b*]pyridinium 3-oxide hexafluorophosphate (HATU, 0.95 mole-equivalents relative to the amino acid) and *N,N*-

diisopropylethylamine (DIPEA, 2.0 mole-equivalents relative to the amino acid) with shaking (1 min). The resin was washed with NMP, and the HATU-activated amino acid solution was added to the washed resin. Coupling reactions were shaken at room temperature and allowed to proceed from 2 h to overnight, depending on the equivalents used and the steric bulk of each amino acid. Coupling reactions were routinely checked for completion using a Kaiser test.<sup>1</sup> Once completed, the resin was filtered and washed with NMP, followed by Fmoc-deprotection using 20% piperidine in DMF for 10 min with shaking. Deprotection of the 1-(4,4-dimethyl-2,6-dioxocyclohex-1-ylidene)-3-methylbutyl (ivDde) group on the Lys  $\epsilon$ -amine group was performed by treatment with 2% (v/v) hydrazine monohydrate in NMP (two times for 3 h to overnight each). The resin was subsequently coupled with succinylated Wortmannin (prepared as described below and shown in Scheme S1) (1.0 equivalents based on resin loading) using HATU (0.95 mole-equivalents relative to the amino acid) and DIPEA (2.0 mole-equivalents relative to the amino acid) at room temperature with shaking (from 3 h to overnight, twice). After completion of the coupling, the complete resins were washed with DCM and dried *in vacuo*. Cleavage from the finished resin with global deprotection was achieved using a cocktail of TFA/triisopropylsilane (TIPS)/H<sub>2</sub>O = 95:2.5:2.5 (2.0 mL/50 mg resin, 2 h, twice). The mixture was filtered and concentrated under a stream of N<sub>2</sub>. The resulting crude material was dissolved in 0.1% TFA containing MeCN and H<sub>2</sub>O and subjected to preparative reverse-phase HPLC purification. Further purification was conducted using semi-preparative reverse-phase HPLC when needed.

### 3. Synthesis of succinylated Wortmannin.

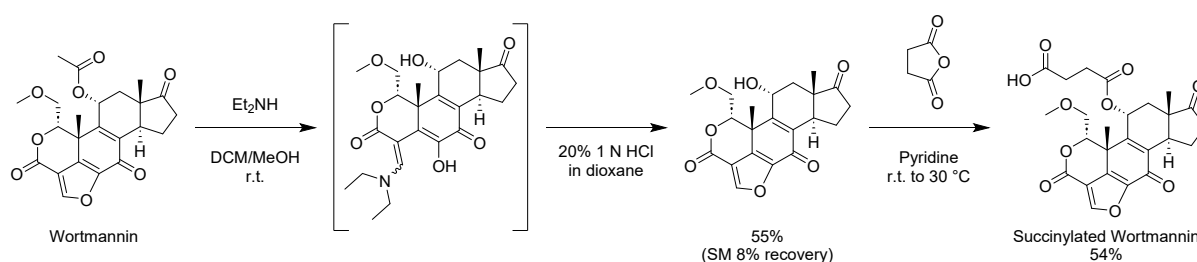

**Scheme S1.** Synthesis of succinylated Wortmannin.<sup>2,3</sup>

Wortmannin (100 mg, 0.233 mmol) and Et<sub>2</sub>N (724  $\mu$ L, 7.00 mmol) were dissolved in DCM (1.0 mL) and MeOH (0.30 mL). The mixture was stirred at r.t. for 7 d with additional MeOH (0.60 mL) and Et<sub>2</sub>N (241  $\mu$ L, 10 eq.). The resulting mixture was evaporated *in vacuo* to remove volatiles. The resulting crude material was treated with 20% 1 N HCl/dioxane (1 mL:4 mL) at r.t. for 1 d. The mixture was concentrated *in vacuo*, and then diluted with H<sub>2</sub>O. The aqueous mixture was extracted with DCM and dried over Na<sub>2</sub>SO<sub>4</sub>. The crude material was purified by CombiFlash automatic silica gel column chromatography (0 to 50% hexane/EtoAc over 30 min) to yield (1*S*,6*bR*,9*aS*,11*R*,11*bR*)-11-hydroxy-1-(methoxymethyl)-9*a*,11*b*-dimethyl-1,6*b*,7,8,9*a*,10,11,11*b*-octahydro-3*H*-furo[4,3,2-*de*]indeno[4,5-*h*]isochromene-3,6,9-trione (49.3 mg, 55%) with Wortmannin (8.2 mg, 8.2%) recovery (Scheme S1).

The (1*S*,6*bR*,9*aS*,11*R*,11*bR*)-11-hydroxy-1-(methoxymethyl)-9*a*,11*b*-dimethyl-1,6*b*,7,8,9*a*,10,11,11*b*-octahydro-3*H*-furo[4,3,2-*de*]indeno[4,5-*h*]isochromene-3,6,9-trione (49.3 mg, 0.128 mmol) was dissolved in pyridine (2.6 mL) and the solution was treated with succinic anhydride (54.3 mg, 0.542 mmol). The mixture was stirred at r.t. for 3 d and at 30 °C for 3 d with additional succinic anhydride (4.25 eq., three times). The mixture was then evaporated, and the residue was purified by CombiFlash automatic silica gel column chromatography (0 to 80% hexane/EtOAc over 30 min) to yield the succinylated Wortmannin (33.7 mg, 54%) as brown oil (Scheme S1).

#### 4. Synthesis of bivalent ligands **7** and **8**.

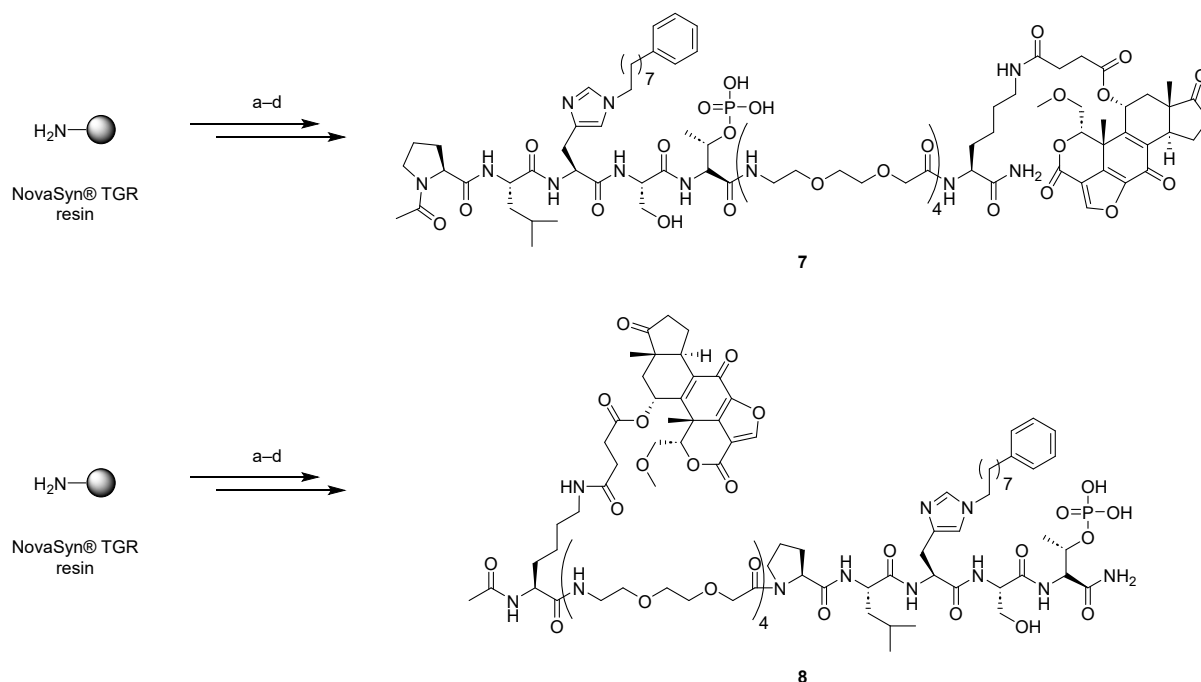

**Scheme S2.** Synthesis of bivalent ligands **7** and **8**. (a) Fmoc-SPPS using Fmoc-Lys(ivDde)-OH; (b) 2%  $\text{H}_2\text{NNH}_2$  in NMP; (b) succinylated Wortmannin, HATU, DIPEA, NMP; (c) TFA/TIPS/ $\text{H}_2\text{O}$  = 95:2.5:2.5.

The synthesis of bivalent ligands **7** and **8** was achieved following the general Fmoc-SPPS protocols mentioned above and shown in Scheme S2. The characterized data of these synthesized peptides are shown in Table S1.

**Table S1.** Characterization data of synthesized peptides.

| Compound number | Calcd M.W.                       | Found  | Preparative HPLC gradient      | Analytical HPLC (10 to 100% of B in A over 30 min) Retention time ( $t_R$ , min) |
|-----------------|----------------------------------|--------|--------------------------------|----------------------------------------------------------------------------------|
| <b>7</b>        | 1020.5<br>[M + 2H] <sup>2+</sup> | 1020.6 | 0 to 70% of B in A over 30 min | 15.9                                                                             |
| <b>8</b>        | 1020.5<br>[M + 2H] <sup>2+</sup> | 1020.7 | 0 to 70% of B in A over 30 min | 15.4                                                                             |

HPLC eluents were A: 0.1% TFA in  $\text{H}_2\text{O}$ ; B: 0.1% TFA in MeCN.

## 5. Analytical HPLC data for peptides 7 and 8.

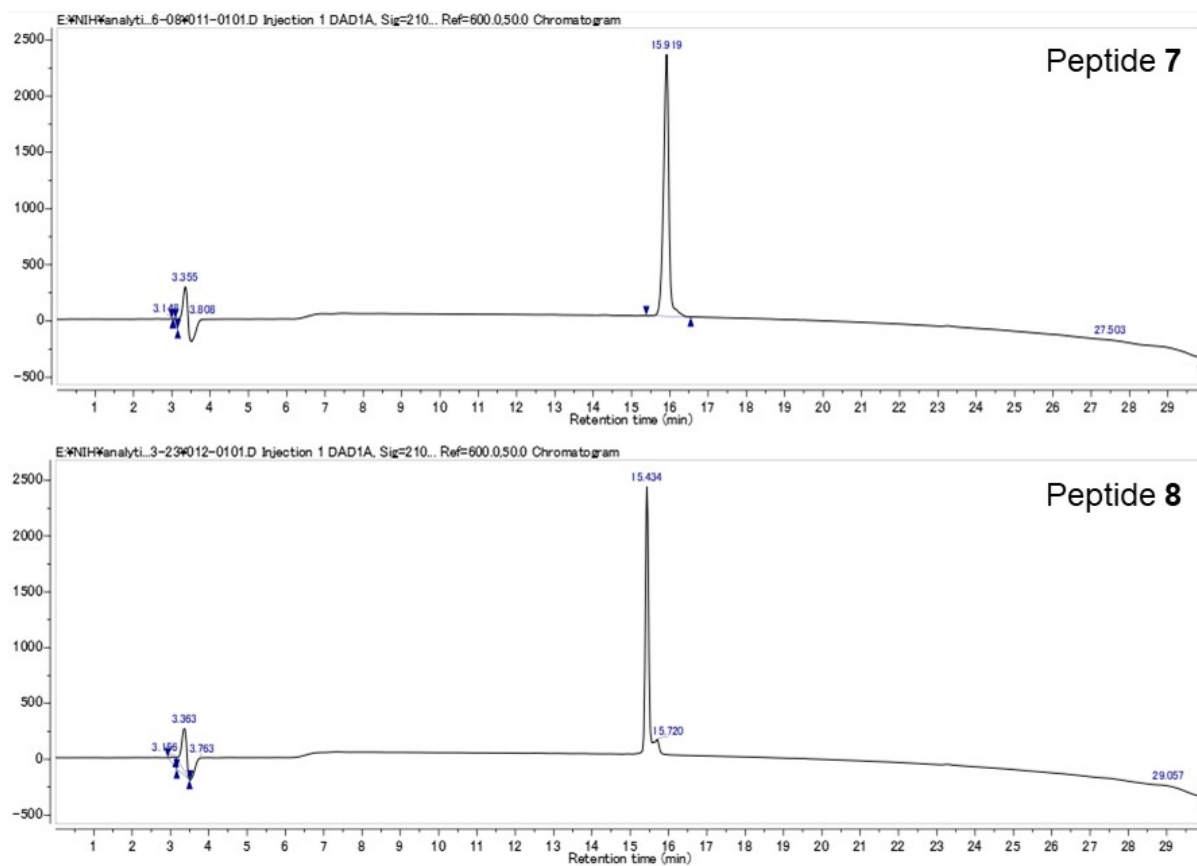



## II. BIOLOGICAL EVALUATION

**1. Expression and purification of full-length Polo-like kinase 1 (Plk1) for fluorescence polarization (FP) assays and fluorescence recovery assays.** As previously reported,<sup>4-7</sup> a plasmid encoding myc-tagged full-length Plk1 (Plasmid #41160) was purchased from Addgene. ~20 M HEK-293T cells (2 x 15 cm plates) were transfected with the plasmid using TurboFect reagent (Thermo Fisher Scientific) according to manufacturer's instructions. Following 48 h expression for full-length Plk1, cells were harvested, lysed in buffer [phosphate buffered saline (PBS, pH 7.4) containing 0.5% NP-40 and protease/phosphatase inhibitor (Pierce, Protease and Phosphatase Inhibitor Mini Tablets) cocktail] using freeze/thaw cycles (3x) and centrifuged at 12,500 x G for 10 min at 4 °C. The supernatant containing expressed protein was diluted into 8 mL of PBS (pH 7.4) containing protease/phosphatase inhibitor cocktail. This protein solution was added to a 1 mL bed of myc-agarose resin (Thermo Fisher Scientific) using a disposable 10 mL polypropylene columns (Thermo Fisher Scientific) and allowed to bind for 2 h at 4 °C with gentle rotation. The lysate was removed by filtration and the resin was washed 4x with HBST (HEPES buffered saline (HBS) containing 0.05% Tween-20, 1 mM DTT and 1 mM EDTA) for 10 min with gentle rotation. The bound myc-tagged Plk1 protein was then eluted with a 1 mg/mL solution of myc peptide (EQKLISEEDL) in HBS + 1 mM DTT and 1 mM EDTA. The purified myc-tagged Plk1 was dialyzed 5x with HBS + 1 mM DTT and 1 mM EDTA using a 10 kDa MWCO filter (Sigma, fixed angle rotor at 7,500 x G, 4 °C, 10 min). The concentration of the final protein solution was determined by absorbance at 280 nm and purity was determined by sodium dodecyl sulfate-polyacrylamide gel electrophoresis (SDS-PAGE) with Coomassie staining using NuPAGE™ 4 to 12%, Bis-Tris, 1.0 mm, Mini Protein Gel, 12-well NuPAGE™ Sample Reducing Agent (10X), NuPAGE™ MOPS SDS Running Buffer (20X), SeeBlue™ Plus2 Pre-stained Protein Standard (Invitrogen), and GelCode™ Blue Safe Protein Stain (Thermo Scientific).

**2. FP assays using purified full-length Plk1.** Purified protein was diluted to a 2x working dilution in assay buffer (HEPES-buffered saline with 0.05% Tween-20, 1 mM DTT, and 1 mM EDTA) with the final protein concentration representing the approximate  $K_d$  values as determined for the probe **FITC-miniPEG-PLH\*SpT**.<sup>7</sup> Inhibitors were serially diluted to generate 4x working dilutions in assay buffer. To each well of a 384-well plate was added 20  $\mu$ L of 2x Plk1 solution (0% binding controls received 20  $\mu$ L of assay buffer). A total of 10  $\mu$ L of the 4x inhibitor solution (or assay buffer as blank) was added to corresponding wells and allowed to pre-incubate at room temperature for 30 min with shaking. Fluorescent probe **FITC-miniPEG-PLH\*SpT** was diluted to 40 nM (4x) in assay buffer and then 10  $\mu$ L was added to each well. The plate was allowed to equilibrate at room temperature for 30 min with shaking. The FP was read using a BioTek Synergy 2 plate reader with 485/20 excitation and 528/20 emission or a TECAN Spark plate reader with 485/15 excitation and 528/15 emission. The FP values were obtained in triplicate and normalized to 100% (no inhibitor) and 0% binding (no protein) controls. Normalized values were plotted versus concentration and analyzed using non-linear regression in GraphPad Prism 10 [log(inhibitor) vs response – variable slope (four parameter) model].  $IC_{50}$  values represent average  $\pm$  standard error of the mean (SEM).

**3. Fluorescence recovery assays using purified full-length Plk1.** Fluorescence recovery assay was performed as previously described.<sup>8</sup> Briefly, purified Plk1 was diluted to a 2x working dilution in assay buffer (HEPES-buffered saline with 0.05% Tween-20, 1 mM DTT, and 1 mM EDTA) with the final protein concentration representing the approximate  $K_d$  values as determined for the probe **FITC-miniPEG-BI2536**. Inhibitors were serially diluted to generate 4x working dilutions in assay buffer. To each well of a 384-well plate was added 20  $\mu$ L of 2x Plk1 solution (0% binding controls received 20  $\mu$ L of assay buffer). A total of 10  $\mu$ L of the 4x inhibitor solution (or assay buffer as blank) was added to corresponding wells and

allowed to pre-incubate at room temperature for 30 min with shaking. Fluorescent probe **FITC-miniPEG-BI2536** were diluted to 80 nM (4x) in assay buffer and then 10  $\mu$ L was added to each well. The plate was allowed to equilibrate at room temperature for 30 min with shaking. The fluorescence intensity was read using a BioTek Synergy 2 plate reader with 485/20 excitation and 528/20 emission. The fluorescence intensity values were obtained in triplicate and normalized to 100% (no inhibitor) and 0% binding (no protein) controls. Normalized values were plotted versus concentration and analyzed using non-linear regression in GraphPad Prism 10 [log(inhibitor) vs response – variable slope (four parameter) model]. IC<sub>50</sub> values represent average  $\pm$  standard error of the mean (SEM).

**4. Cell proliferation assays using HeLa cells.** Cell proliferation assays were performed as following procedure: HeLa cells (American Type Culture Collection (ATCC), Virginia, USA) were seeded in a 96-well plate ( $5 \times 10^3$  cells/well) with 100  $\mu$ L of Dulbecco's modified Eagle's medium (D-MEM) supplemented with 10% fetal bovine serum (FBS), 2 mM L-Gln, 100  $\mu$ g/ml of penicillin, and 100  $\mu$ g/ml of streptomycin for each wells. After 1 day incubation at 37 °C, the media were replaced with the serially diluted compounds containing media. The cells were incubated at 37 °C and cell proliferation was monitored for additional 3 days and analyzed using IncuCyte ZOOM 2015A (Sartorius AG, Göttingen, Germany).

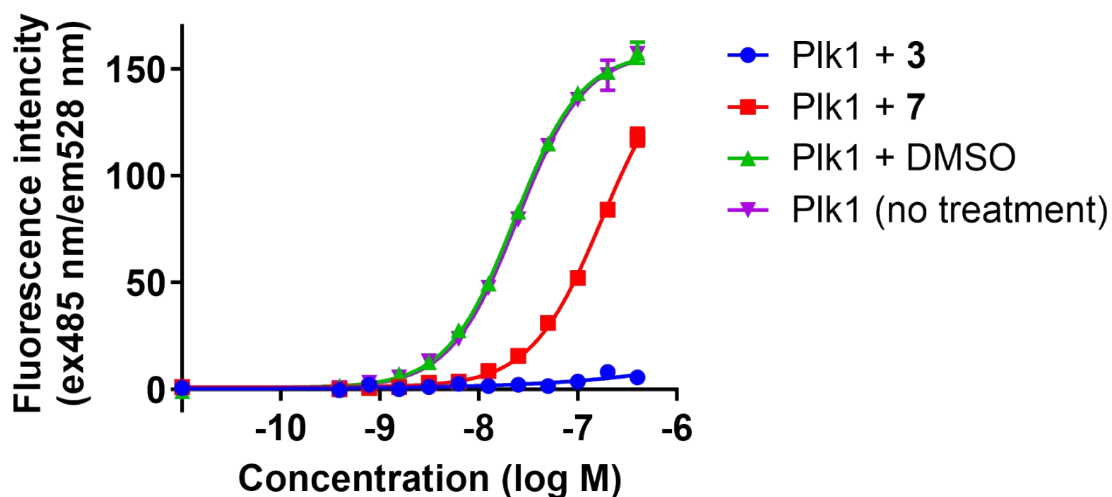

**Figure S1.** Results from fluorescence recovery assays to evaluate Plk1 KD binding of the probe (FITC-miniPEG-BI2536) with pre-treatment of Plk1 with the inhibitors (10 eq.) at 4 °C for 4 h and then the solutions were dialyzed with the assay buffer for 5 times using 10K Da filter. The  $K_d$  values of each condition are Plk1 + **3** (not determined), Plk1 + **7** ( $180 \pm 2.6$  nM), Plk1 + DMSO ( $23 \pm 0.24$  nM), Plk1 (no treatment) ( $24 \pm 0.13$  nM). The X axis represents protein concentration (log M) and the Y axis represents fluorescence intensity (Ex: 485 nm, Em: 528 nm) related to the probe binding. Data points represent average  $\pm$  SEM from two independent experiments and fit using non-linear regression in GraphPad Prism 10.

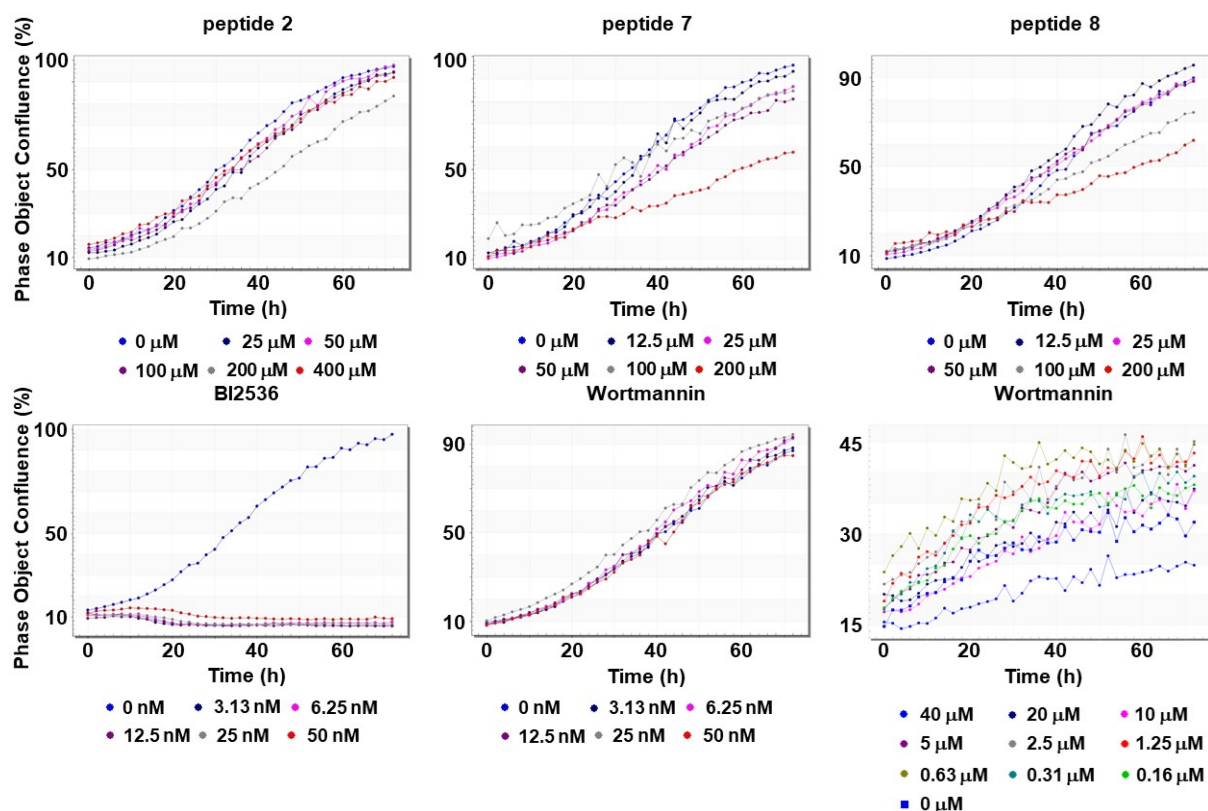

**Figure S2.** Results from cell proliferation assays using HeLa cells. The X axis represents incubation time from inhibitor addition (hours) and the Y axis represents phase object confluence (%). The cell proliferation was monitored and plotted using IncuCyte ZOOM 2015A.

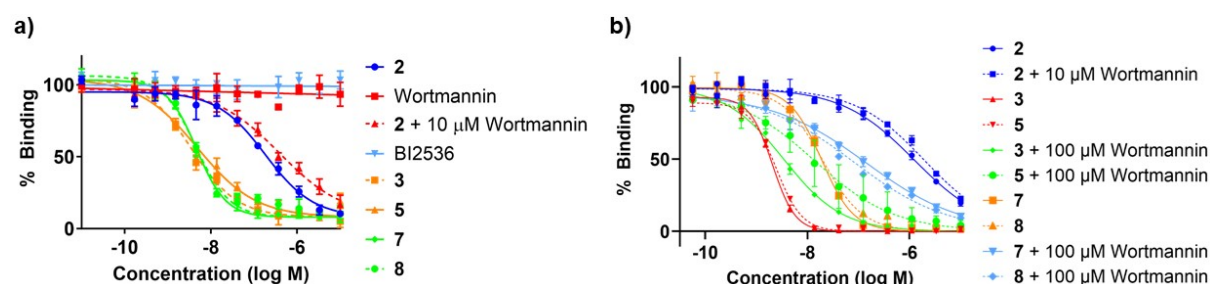

**Figure S3.** Results from fluorescence polarization (FP) assays in Table 1, which measured the ability of Plk1 inhibitors to compete with FITC-miniPEG-PLH\*SpT for binding to full-length Plk1. The results of FP assays in Exp. 1 (a) and Exp. 2 (b) in Table 1 are shown. The X axis represents inhibitor concentration (log M) and the Y axis represents relative probe binding based on the FP (Ex: 485 nm, Em: 528 nm) of no inhibitor (100%) and blank (no protein, 0%).

Data points represent average  $\pm$  SEM from three independent experiments and fit using non-linear regression in GraphPad Prism 10.

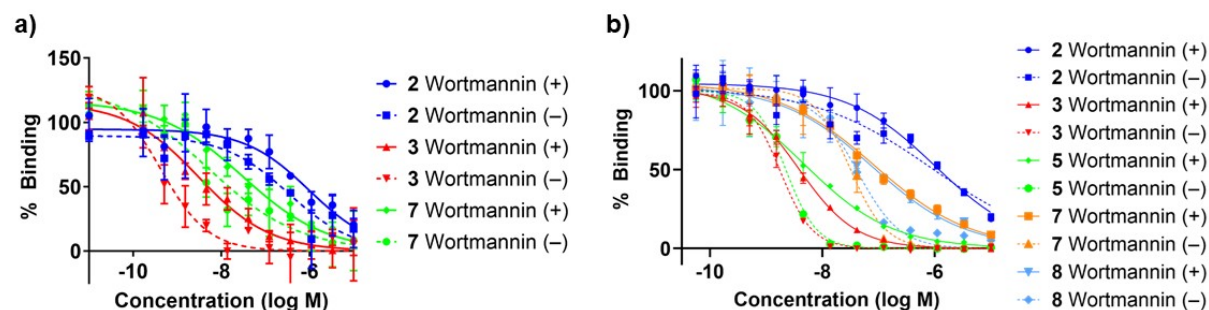

**Figure S4.** Results from fluorescence polarization (FP) assays in Table 2, which measured the ability of Plk1 inhibitors to compete with **FITC-miniPEG-PLH\*SpT** for binding to full-length Plk1. The results of FP assays in Exp. 1 (a) and Exp. 2 (b) in Table 2 are shown. Wortmannin (+): Plk1 was treated with Wortmannin (10 eq.) at 4 °C for 2 h, and then the protein solution was dialyzed with assay buffer for 5 times using 10K Da filter; Wortmannin (-): Plk1 solution was dialyzed with assay buffer for 5 times using 10K Da filter. The X axis represents inhibitor concentration (log M) and the Y axis represents relative probe binding based on the FP (Ex: 485 nm, Em: 528 nm) of no inhibitor (100%) and blank (no protein, 0%). Data points represent average  $\pm$  SEM from three independent experiments and fit using non-linear regression in GraphPad Prism 10.

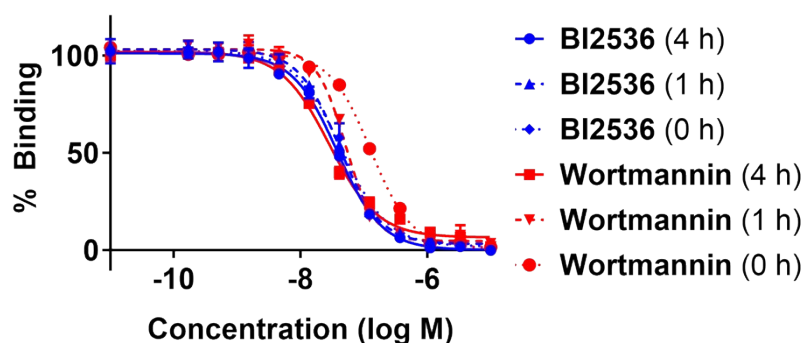

**Figure S5.** Results from fluorescence recovery assays in Table 3, which measured the ability of Plk1 inhibitors to compete with the probe (**FITC-miniPEG-BI2536**) for binding to full-length Plk1. Plk1 was incubated with various concentrations of BI2536 or Wortmannin at r.t. for 0, 2, or 4 h in a 384-well plate. The plate was then added the probe solution and allowed to equilibrate at room temperature for 30 min with shaking to measure the fluorescence intensity. The X axis represents inhibitor concentration (log M) and the Y axis represents relative probe binding based on the fluorescence intensity (Ex: 485 nm, Em: 528 nm) of no inhibitor (100%) and blank (no protein, 0%). Data points represent average  $\pm$  SEM from three independent experiments and fit using non-linear regression in GraphPad Prism 10.

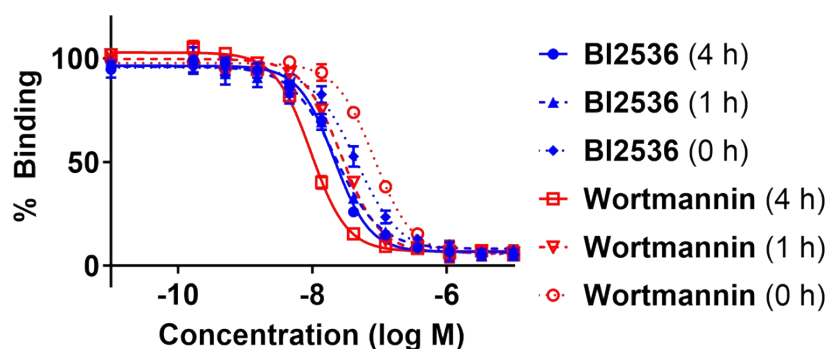

**Figure S6.** Results from fluorescence recovery assays in Table 3, which measured the ability of Plk1 inhibitors to compete with the probe (**FITC-miniPEG-BI2536**) for binding to full-length Plk1. Plk1 was incubated with various concentrations of BI2536 or Wortmannin at 4 °C for 0, 2, or 4 h in a 384-well plate. The plate was then added the probe solution and allowed to equilibrate at room temperature for 30 min with shaking to measure the fluorescence intensity. The X axis represents inhibitor concentration (log M) and the Y axis represents relative probe binding based on the fluorescence intensity (Ex: 485 nm, Em: 528 nm) of no inhibitor (100%) and blank (no protein, 0%). Data points represent average  $\pm$  SEM from three independent experiments and fit using non-linear regression in GraphPad Prism 10.

## REFERENCES

1. E. Kaiser, R. L. Colescott, C. D. Bossinger, P. I. Cook, *Anal. Biochem.*, 1970, **34**, 595-598.
2. Y. Liu, K. R. Shreder, W. Gai, S. Corral, D. K. Ferris, J. S. Rosenblum, *Chem. Biol.*, 2005, **12**, 99-107.
3. L. C. Creemer, H. A. Kirst, C. J. Vlahos, R. M. Schultz, *J. Med. Chem.*, 1996, **39**, 5021-5024.
4. X. Z. Zhao, D. Hymel and T. R. Burke, Jr., *Bioorg. Med. Chem. Lett.*, 2016, **26**, 5009-5012.
5. X. Z. Zhao, D. Hymel and T. R. Burke, Jr., *Bioorg. Med. Chem.*, 2017, **25**, 5041-5049.
6. D. Hymel, T. R. Burke, Jr., *ChemMedChem*, 2017, **12**, 202-206.
7. K. Tsuji, D. Hymel, B. Ma, H. Tamamura, R. Nussinov, T. R. Burke, Jr., *RSC Chem. Biol.*, 2022, **3**, 1111-1120.
8. K. Tsuji, D. Hymel and T. R. Burke, Jr., *Anal. Methods*, 2020, **12**, 4418-4421.
